# Supplementary material for: TNFα sensitizes hepatocytes to FasL-induced apoptosis by NFκB-mediated Fas upregulation
Source: PubMed Central journal article supplement (PMC6125596; doi:10.1038/s41419-018-0935-9), 2018-09-05
Supplement: 41419_2018_935_MOESM1_ESM.pdf [file 41419_2018_935_MOESM1_ESM.pdf]

## Supplementary Information

### Supplementary Figure 1: TNF $\alpha$ triggers increased Fas protein expression in SV40 immortalized and primary MEFs and sensitizes the cells to FasL-induced apoptosis. (a)

Annexin-V-FITC/7-AAD FACS analysis of SV40 immortalized mouse embryonic fibroblasts (MEFs), either untreated, treated with TNF $\alpha$  or FasL alone or pretreated with TNF $\alpha$  14 h before adding FasL for 4 h. Annexin-V-FITC/7-AAD negative surviving cells are depicted. Less cells survive in response to TNF $\alpha$ /FasL than FasL alone. Caspase-3/-7 activity of total lysates of primary (b) or SV40 immortalized MEFs (c), treated as described under (a), showing enhanced protease activity in TNF $\alpha$  + FasL as compared to FasL-treated cells. Values shown are from three independent experiments; the horizontal line represents the mean. Anti-Fas western blot analysis of total extracts of primary (d) or SV40 MEFs (e), treated as described under (a), showing increased Fas protein expression in response to TNF $\alpha$  treatment. Actin serves as loading control.

### Supplementary Figure 2: TNF $\alpha$ -induced Fas mRNA and protein expression are impaired in p65 knockout or I $\kappa$ B $\alpha$ dominant-negative expressing MEFs. (a)

RT-qPCR analysis of Fas mRNA (shown as fold change normalized to L32 mRNA) in Wt 3T3 or SV40 immortalized Wt or p65 knockout (KO) MEFs after 4 and 8 h of TNF $\alpha$  treatment. (b) FACS analysis of surface Fas expression in Wt and p65 KO SV40 MEFs after 14 h of TNF $\alpha$  treatment. Both the induction of Fas mRNA and protein surface expression by TNF $\alpha$  are abrogated when p65 expression is lost. Fas protein surface expression even seemed to be controlled by p65 in the absence of TNF $\alpha$  treatment. (c) Caspase-3/-7 activity of total lysates of SV40 MEFs transiently transfected with empty pcDNA3.1. vector or pcDNA3.1. containing a cDNA encoding for a phosphorylation-deficient, dominant negative mutant of I $\kappa$ B $\alpha$  (I $\kappa$ BDN), either untreated, treated with TNF $\alpha$  or FasL alone or pretreated with TNF $\alpha$  for 14 h before adding FasL for 4 h. I $\kappa$ B $\alpha$ DN expression abolishes the TNF $\alpha$ -induced sensitization to FasL-induced caspase-3 activation. a.u.: arbitrary units. Values shown represent the mean  $\pm$  SD of three independent experiments (a and b). In (c) the horizontal line represents the mean of three independent experiments. (d) Anti-I $\kappa$ B $\alpha$  and anti-Fas western blot analysis of total

lysates of SV40 MEFs expressing empty pcDNA3.1 or I $\kappa$ B $\alpha$ DN, either untreated, treated with TNF $\alpha$  or FasL alone or pretreated with TNF $\alpha$  for 14 h before adding FasL for 3 or 6 h. Actin serves as loading control. Overexpression of I $\kappa$ B $\alpha$ DN diminishes Fas expression and TNF $\alpha$ -induced Fas upregulation.

**Supplementary Figure 3: TNF $\alpha$  induces NF $\kappa$ B activation and increased Fas protein expression in primary mouse hepatocytes and Hepa1-6 cells.** Anti-phospho I $\kappa$ B $\alpha$ , anti-I $\kappa$ B $\alpha$ , anti-phospho p65 **(a)** or anti-Fas **(b)** western blots analysis of total extracts of primary hepatocytes treated with TNF $\alpha$  for different time points. Actin or tubulin serve as loading controls. TNF $\alpha$  triggers early I $\kappa$ B $\alpha$  phosphorylation and subsequent degradation as well as concomitant p65 phosphorylation. After 1 h the levels of I $\kappa$ B $\alpha$  were restored. Fas expression started to increase after 4-6 h of TNF $\alpha$  treatment. **(c)** The same analysis as in (a) but with Hepa1-6 cells.

**Supplementary Figure 4: Validation of *de novo* SplashRNA predictions for the knockdown of Fas and p65 in Hepa1-6 cells.** **(a)** Schematic map of the validated constitutive (pMSCV) retroviral miR-E expression vector and western blot analysis of several miRE-shFas predictions. The six miRE-shFas predictions (Fas1-6) and a miRE-shRenilla were cloned into the indicated retroviral vector and then expressed in 3T3 MEFs at single-copy conditions to determine the knockdown efficiency of each single oligonucleotide. Knockdown efficiencies are depicted and  $\beta$ -actin serves as loading control. **(b)** Anti-Fas western blot analysis of total extracts of Hepa1-6 expressing the Fas-1 shRNA. Knockdown efficiency is ca. 70%. Tubulin serves as loading control. **(c)** Caspase-3/-7 activity in total lysates of shRenilla or shFas Hepa1-6 cells, either untreated, treated with TNF $\alpha$  or FasL alone or pretreated with TNF $\alpha$  for 14 h before adding FasL for 4 h. Knockdown of Fas expression significantly decreases FasL-induced caspase-3 activation. Values shown are the means of three independent experiments  $\pm$  SD. **(d)** Anti-p65, anti-Fas, anti-I $\kappa$ B $\alpha$  and anti-Bcl-x<sub>L</sub> western blot analysis of total extracts of shRenilla and shp65 and Wt Hepa1-6 cells showing an efficient (70%) knockdown of p65 expression concomitant with diminished expression of the NF $\kappa$ B target genes I $\kappa$ B $\alpha$  and Bcl-x<sub>L</sub>. Tubulin serves as loading control.

**Supplementary Figure 5: p65 and Fas surface expression in the liver of PBS or TNF $\alpha$ -treated mice injected with shp65 plasmids via the tail vein.** Mice were hydrodynamically injected through the tail vein with transposon vectors carrying p65 shRNAs plus a vector carrying a transposase. After 5 days, they were i.p injected either with PBS (left panels) or TNF $\alpha$  (right panels) and sacrificed after 14 h. Liver slices were incubated with anti-mFas, anti-p65, anti-GFP or IgG isotype control (data not shown) primary antibodies followed by incubation with anti-rabbit-Alexa 594 (red, p65 or Fas) and anti-chicken-Alexa 488 (green, GFP) secondary antibodies. **(a)** Upper panel shows GFP+ cells with p65 red staining, lower panel shows only p65 red staining of both, PBS and TNF $\alpha$  treated mice. p65 expression is clearly diminished in GFP+ cells due to shp65 expression (compare upper panel and lower panel, see arrows). **(b)** Fas expression (red staining) is increased on the surface of hepatocytes (arrows) after injecting the mice with TNF $\alpha$  but Fas content in GFP+ shp65 expressing hepatocytes is difficult to assess (see text).
