# Supplementary material for: TNFα sensitizes hepatocytes to FasL-induced apoptosis by NFκB-mediated Fas upregulation
Source: PubMed Central journal article supplement (PMC6125596; doi:10.1038/s41419-018-0935-9), 2018-09-05
Supplement: 41419_2018_935_MOESM7_ESM.pdf [file 41419_2018_935_MOESM7_ESM.pdf]

Original – Scans of Westernblots  
Figure 2

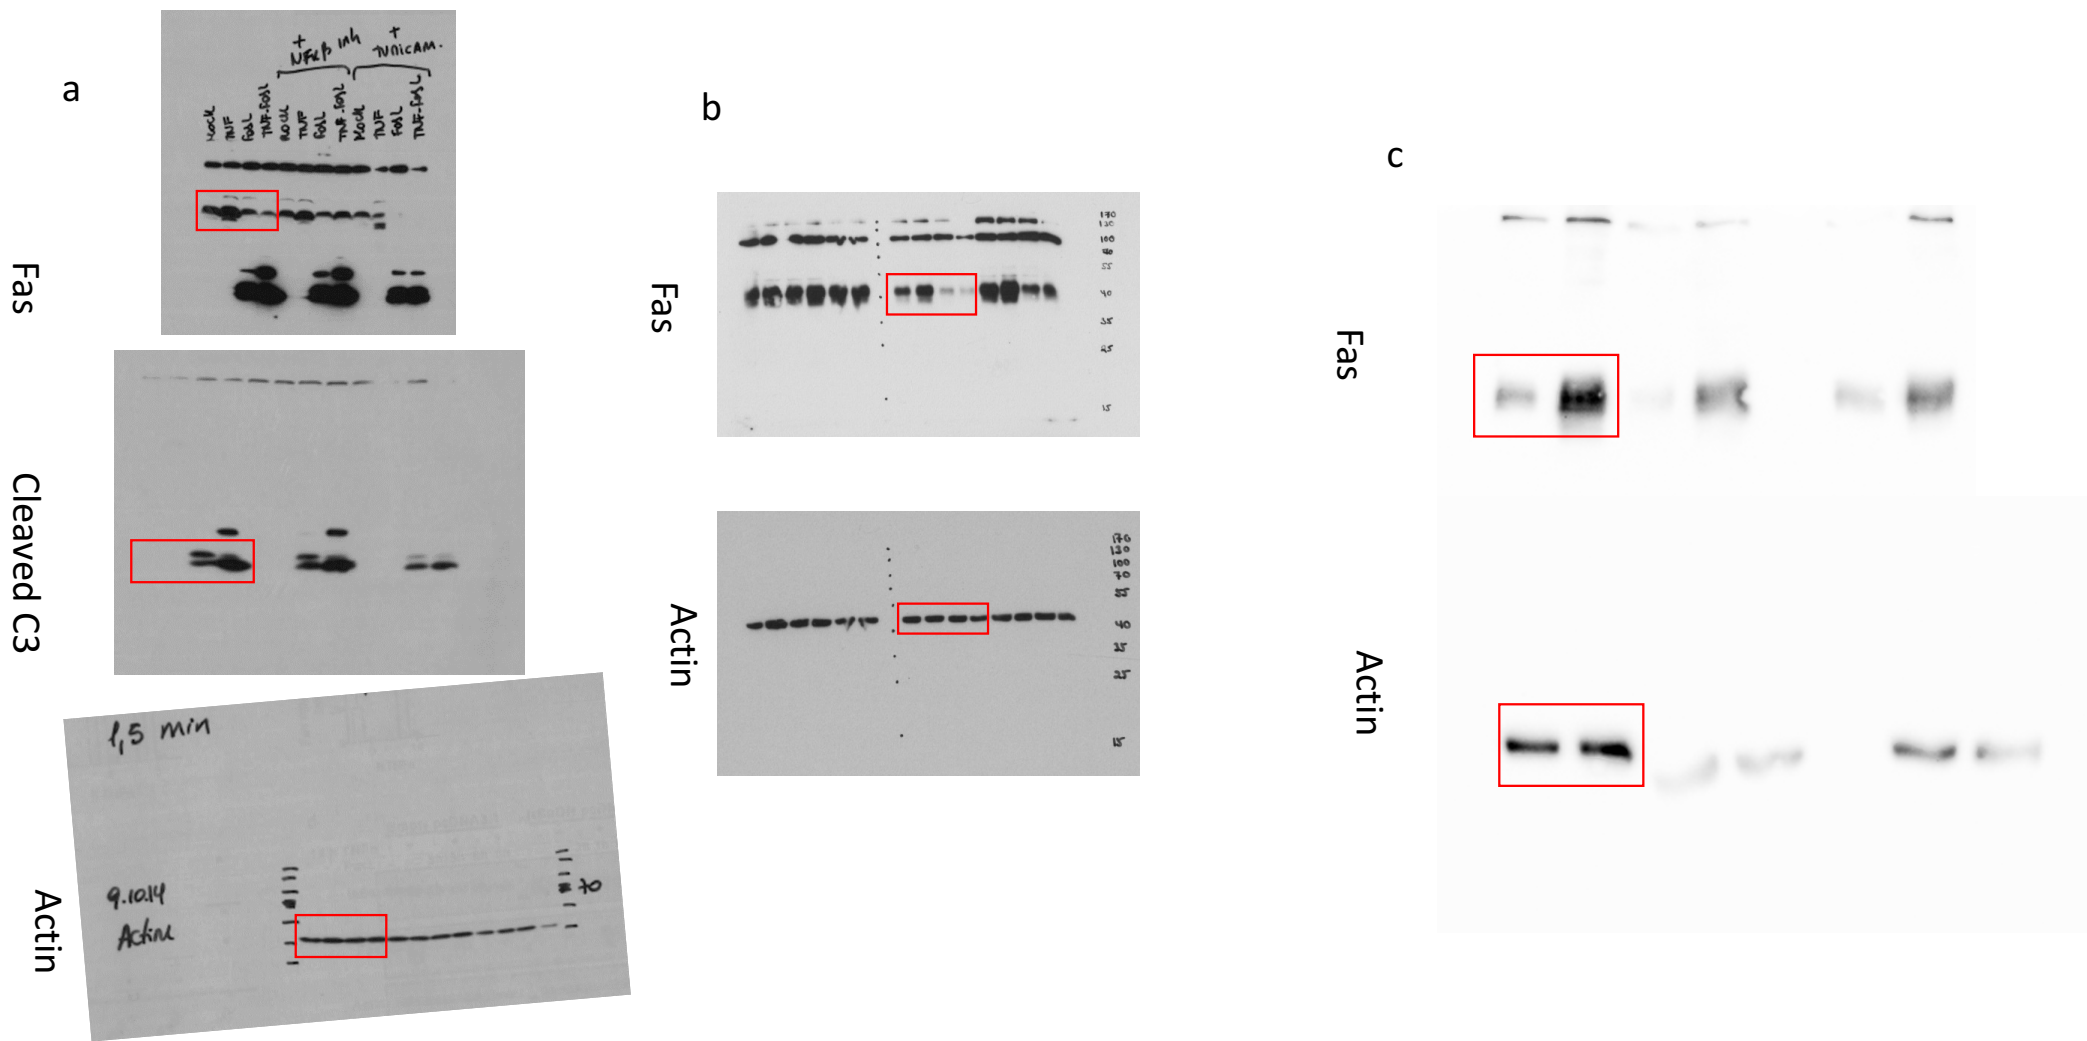

Original – Scans of Westernblots  
Figure 3

Fas  
Tubulin

a

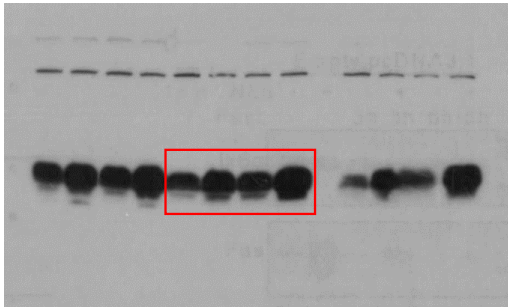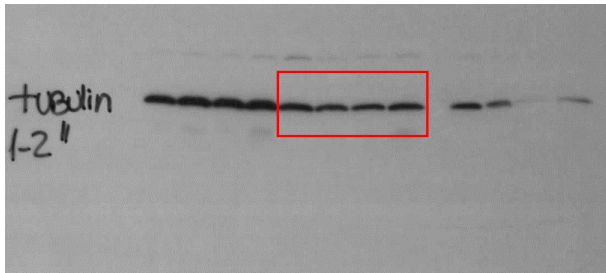

b

Fas

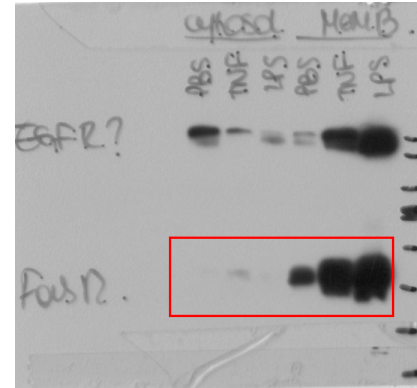

E-Cadherin

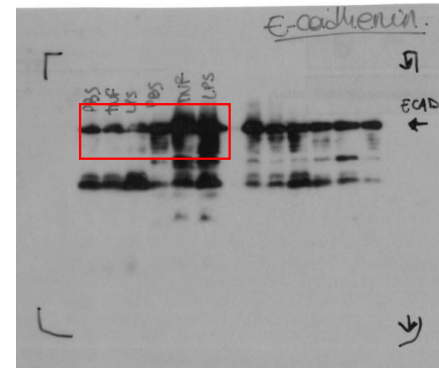

Tubulin

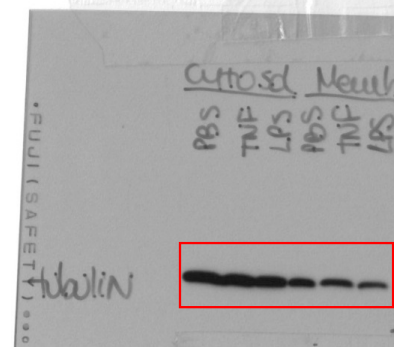

Original – Scans of Westernblots  
Figure 4

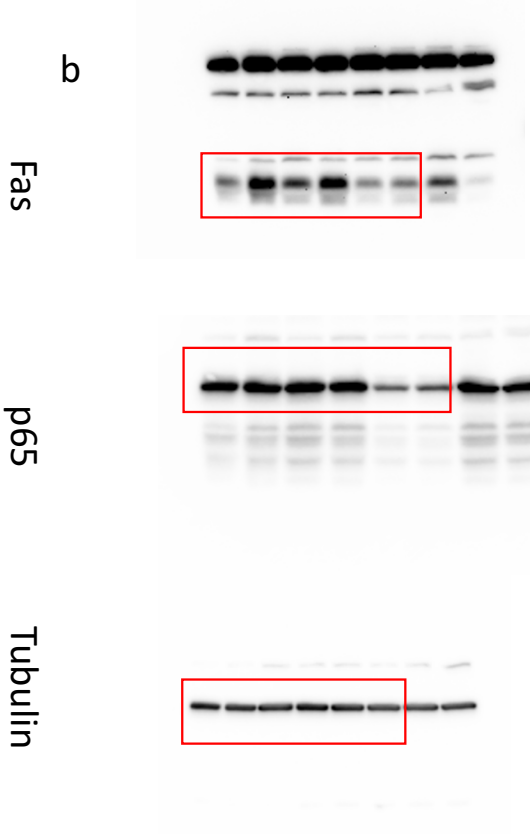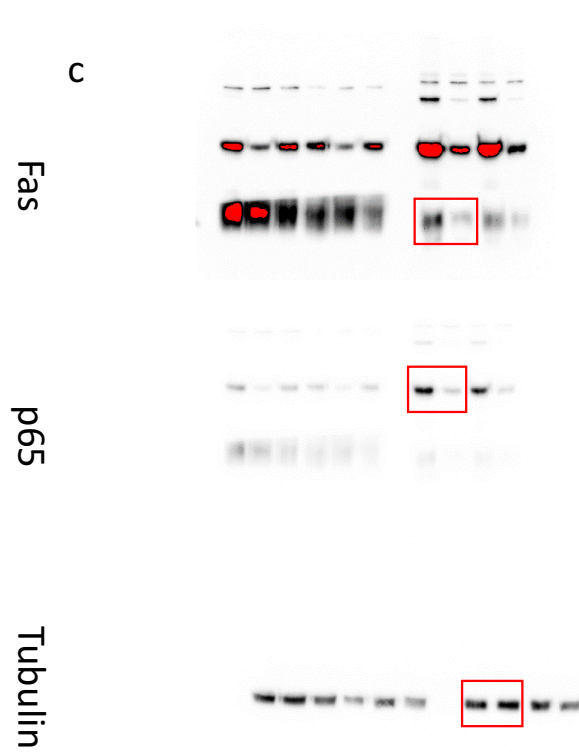

Original – Scans of Westernblots  
Figure 5

c

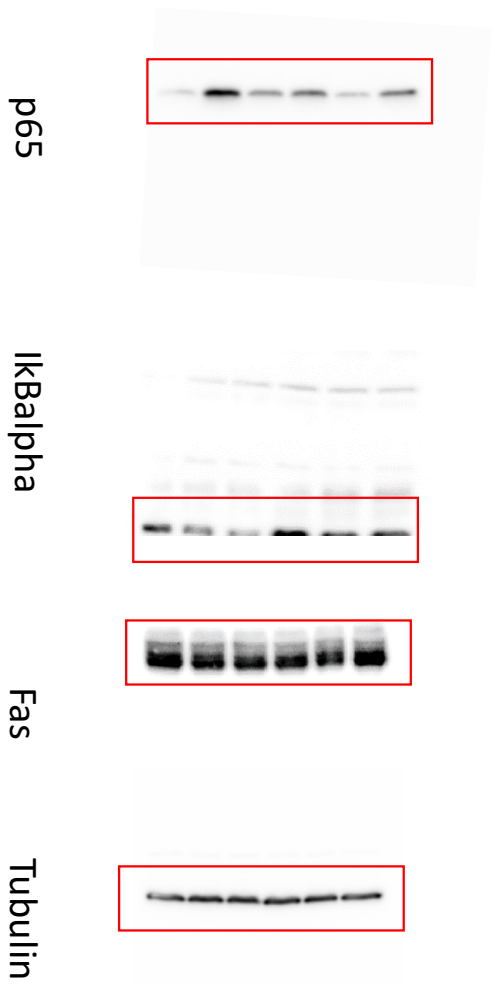

d

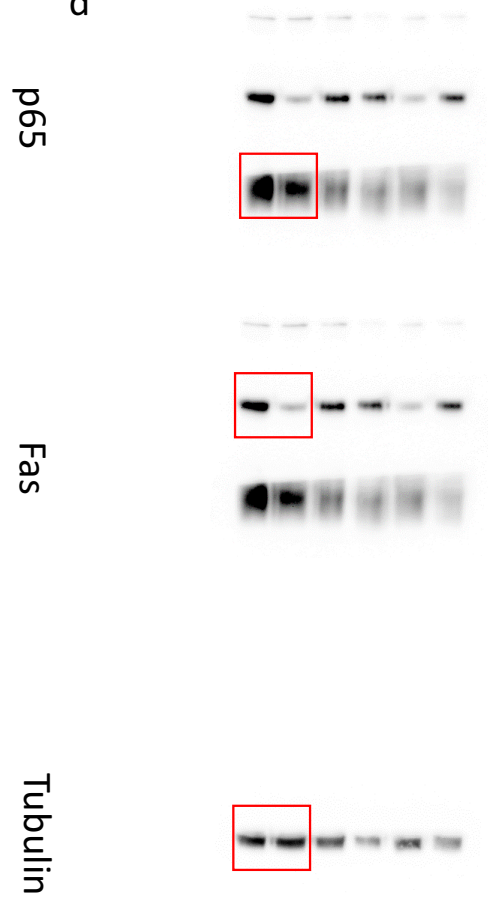

Original – Scans of Westernblots  
Supplementary figure 1

d

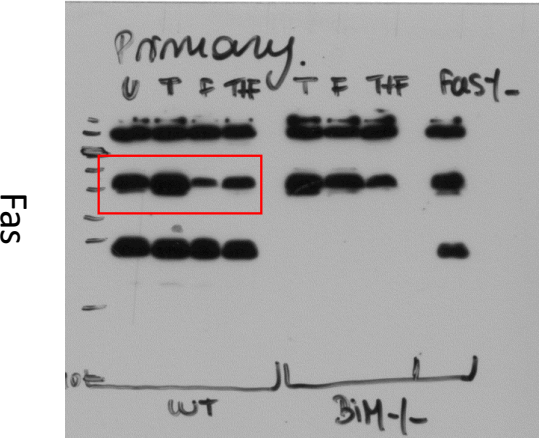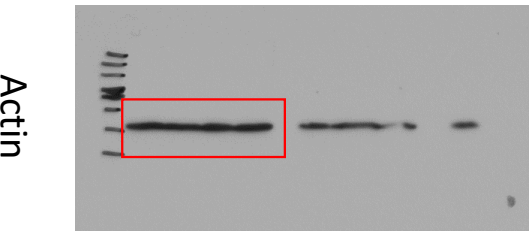

e

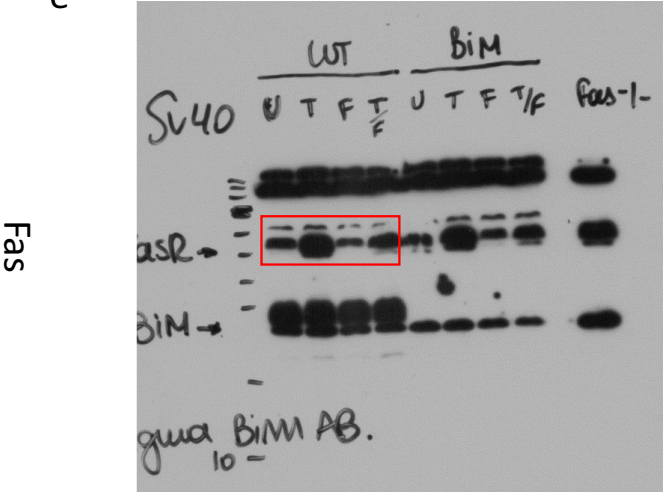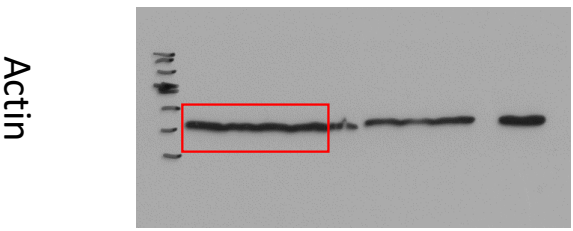

Original – Scans of Westernblots  
Supplementary figure 2

d

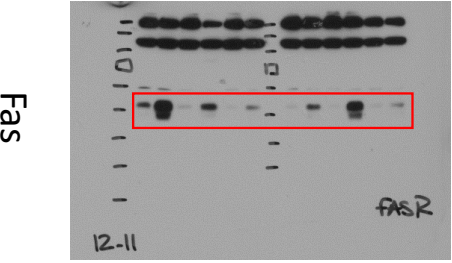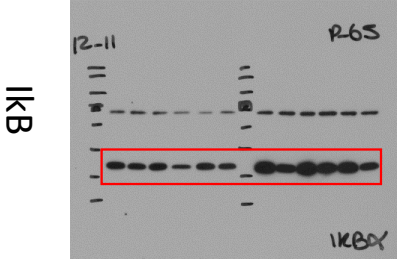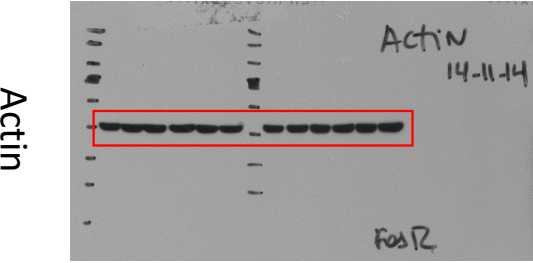

Original – Scans of Westernblots  
Supplementary figure 3

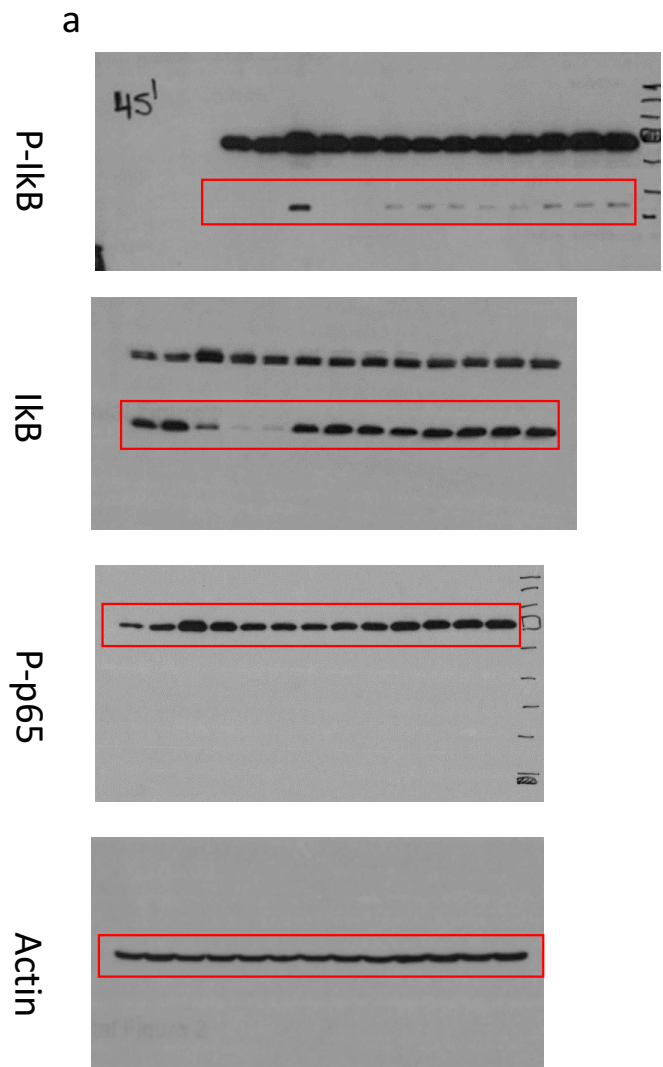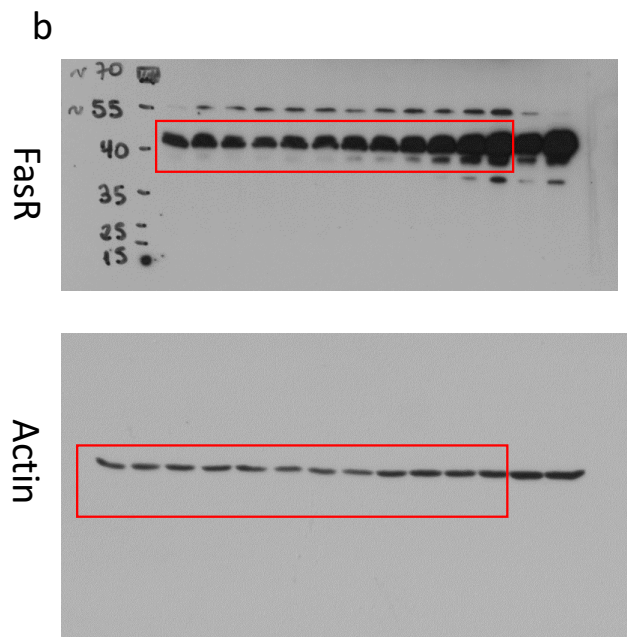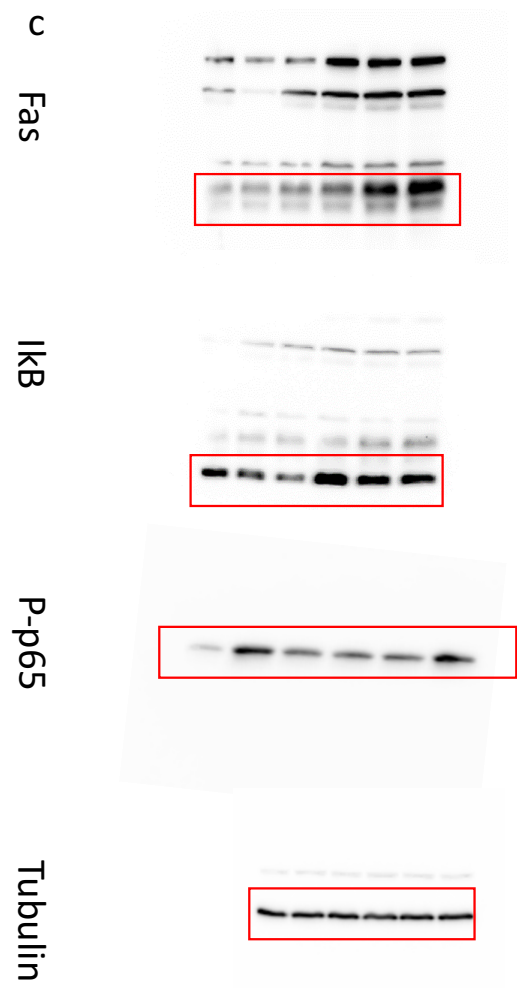



Original – Scans of Westernblots  
Supplementary figure 4

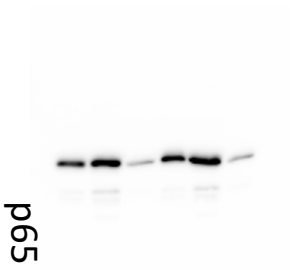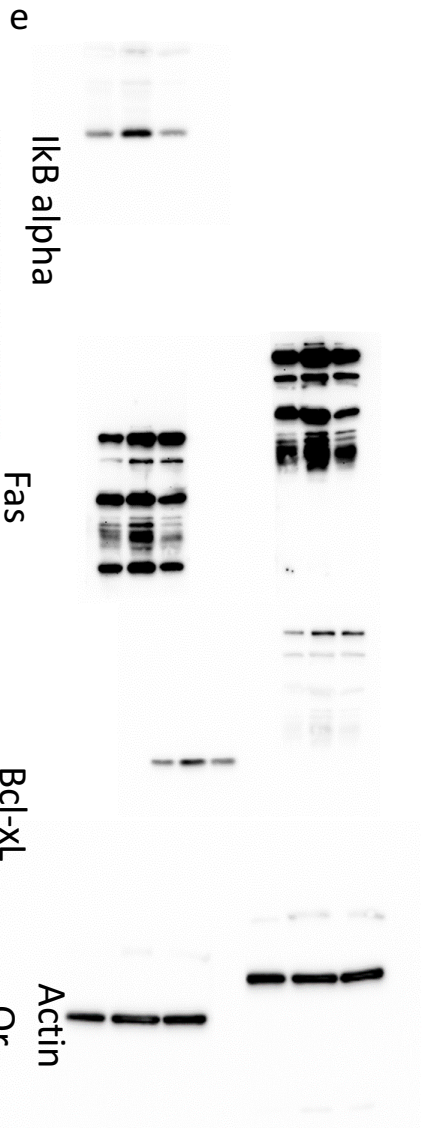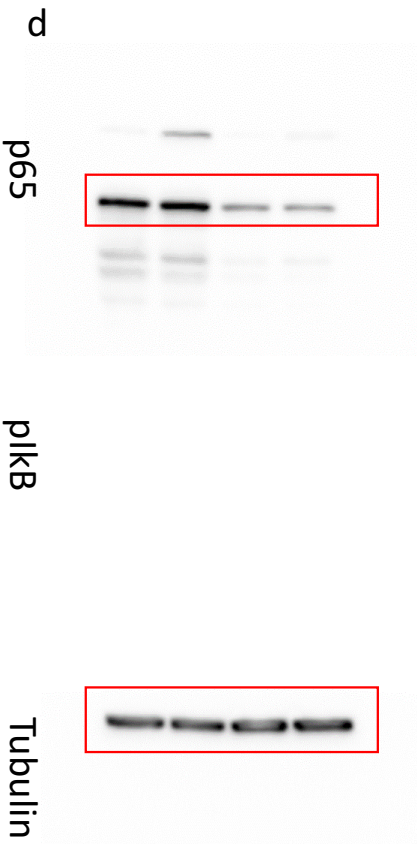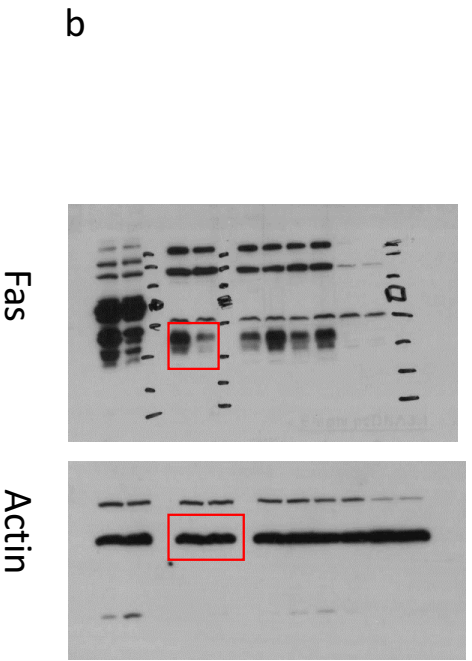

Figures  
still  
missing

a

b
